# Supplementary material for: Placental Microarray Profiling Reveals Common mRNA and lncRNA Expression Patterns in Preeclampsia and Intrauterine Growth Restriction
Source: PubMed Central journal article supplement (PMC7279523; doi:10.3390/ijms21103597), 2020-05-20
Supplement: ijms-21-03597-s001.pdf [file ijms-21-03597-s001.pdf]

**Supplementary Table S1.** Placental Histopathological Findings in Preeclampsia and Intrauterine Growth Restriction.

| Placental Histopathology              | IUGR %n/n | PE %n/n    | PE-IUGR %n/n | <i>p</i>    |                  |                |
|---------------------------------------|-----------|------------|--------------|-------------|------------------|----------------|
|                                       |           |            |              | IUGR vs. PE | IUGR vs. PE-IUGR | PE vs. PE-IUGR |
| Distal villous hypoplasia             | 40 (4/10) | 75 (6/8)   | 100 (3/3)    | 0.5271      | 0.7055           | 0.3173         |
| Placental infarction                  | 80 (8/10) | 100 (8/8)  | 100 (3/3)    | 1           | 0.1317           | 0.1317         |
| Villous hypermaturation patterns      | 50 (5/10) | 87.5 (7/8) | 100 (3/3)    | 0.5637      | 0.4795           | 0.2059         |
| Syncytial knots                       | 0 (0/10)  | 25 (2/8)   | 66.7 (2/3)   | 0.1573      | 0.1573           | 1              |
| Massive perivillous fibrin deposition | 30 (3/10) | 25 (2/8)   | 0 (0/3)      | 0.6547      | 0.08326          | 0.1573         |

**Supplementary Table S2.** List of significantly differentially expressed genes by contrast.

| Gene               | logFC | P.Value     | adj.P.Val | Contrasts | Transcript_Type |
|--------------------|-------|-------------|-----------|-----------|-----------------|
| <i>IGFBP1</i>      | 6.0   | 8.25E-06    | 0.08      | PS-CTRL   | mRNA            |
| <i>EGFR-AS1</i>    | 3.7   | 1.23E-05    | 0.08      | PS-CTRL   | lnc-RNA         |
| <i>C11orf86</i>    | 2.8   | 3.24E-05    | 0.09      | PS-CTRL   | mRNA            |
| <i>STAR</i>        | 3.6   | 4.82E-05    | 0.09      | PS-CTRL   | mRNA            |
| <i>ITGAD</i>       | 1.6   | 4.94E-05    | 0.09      | PS-CTRL   | mRNA            |
| <i>FGG</i>         | 4.8   | 5.21E-05    | 0.09      | PS-CTRL   | mRNA            |
| <i>PBX4</i>        | 2.3   | 6.71E-05    | 0.09      | PS-CTRL   | mRNA            |
| <i>SOAT2</i>       | 2.3   | 6.74E-05    | 0.09      | PS-CTRL   | mRNA            |
| <i>ZNF683</i>      | 2.9   | 7.43E-05    | 0.09      | PS-CTRL   | mRNA            |
| <i>LRRC15</i>      | 3.8   | 7.81E-05    | 0.09      | PS-CTRL   | mRNA            |
| <i>OLAH</i>        | -2.6  | 8.07E-05    | 0.09      | PS-CTRL   | mRNA            |
| <i>CATSPER1</i>    | 2.4   | 8.56E-05    | 0.09      | PS-CTRL   | mRNA            |
| <i>TWIST2</i>      | 1.8   | 9.38E-05    | 0.09      | PS-CTRL   | mRNA            |
| <i>TMEM132C</i>    | 2.2   | 9.76E-05    | 0.09      | PS-CTRL   | mRNA            |
| <i>FLJ31356</i>    | 2.0   | 8.39E-05    | 0.09      | PS-CTRL   | lnc-RNA         |
| <i>lnc-TCL1B-1</i> | -2.2  | 0.000148222 | 0.09      | PS-CTRL   | lnc-RNA         |
| <i>lnc-MRPS5-1</i> | -2.2  | 0.0001535   | 0.09      | PS-CTRL   | lnc-RNA         |
| <i>GNB5</i>        | 1.6   | 0.000116919 | 0.09      | PS-CTRL   | mRNA            |
| <i>GNGT1</i>       | -2.2  | 0.000119    | 0.09      | PS-CTRL   | mRNA            |
| <i>GNG4</i>        | 2.5   | 0.000131396 | 0.09      | PS-CTRL   | mRNA            |
| <i>lnc-PPM1D-1</i> | -1.6  | 0.000170353 | 0.09      | PS-CTRL   | lnc-RNA         |
| <i>PRL</i>         | 4.3   | 0.000164144 | 0.09      | PS-CTRL   | mRNA            |
| <i>TRIM64</i>      | 3.6   | 0.000169078 | 0.09      | PS-CTRL   | mRNA            |

|                           |      |             |      |            |         |
|---------------------------|------|-------------|------|------------|---------|
| <i>ADAD1</i>              | -1.3 | 0.000170575 | 0.09 | PS-CTRL    | mRNA    |
| <i>FBXO2</i>              | 2.3  | 0.000179233 | 0.09 | PS-CTRL    | mRNA    |
| <i>CD40LG</i>             | 1.9  | 0.000188632 | 0.09 | PS-CTRL    | mRNA    |
| <i>TNFRSF8</i>            | 2.1  | 0.000194635 | 0.09 | PS-CTRL    | mRNA    |
| <i>LOC729739</i>          | 3.0  | 0.000198275 | 0.09 | PS-CTRL    | mRNA    |
| <i>FOXL2</i>              | 3.0  | 0.000208032 | 0.09 | PS-CTRL    | mRNA    |
| <i>STON1-GTF2<br/>A1L</i> | 2.0  | 0.000250919 | 0.09 | PS-CTRL    | lnc-RNA |
| <i>PDE6H</i>              | 3.0  | 0.000226665 | 0.09 | PS-CTRL    | mRNA    |
| <i>CHST2</i>              | 1.7  | 0.00024051  | 0.09 | PS-CTRL    | mRNA    |
| <i>CPEB1</i>              | 1.7  | 0.000240782 | 0.09 | PS-CTRL    | mRNA    |
| <i>IL1R2</i>              | 3.6  | 0.000243415 | 0.09 | PS-CTRL    | mRNA    |
| <i>MED4-AS1</i>           | 2.5  | 0.000245393 | 0.09 | PS-CTRL    | lnc-RNA |
| <i>PRUNE2</i>             | 2.3  | 0.000250615 | 0.09 | PS-CTRL    | mRNA    |
| <i>lnc-VAPA-1</i>         | 3.2  | 0.000219149 | 0.09 | PS-CTRL    | lnc-RNA |
| <i>C8orf31</i>            | 1.6  | 0.00025149  | 0.09 | PS-CTRL    | mRNA    |
| <i>KCNK12</i>             | 2.8  | 0.000260278 | 0.09 | PS-CTRL    | mRNA    |
| <i>lnc-TRPM7-1</i>        | -1.8 | 0.000270996 | 0.09 | PS-CTRL    | lnc-RNA |
| <i>CABYR</i>              | 2.7  | 2.60E-06    | 0.04 | P.RES-CTRL | mRNA    |
| <i>MCEMP1</i>             | 3.2  | 1.12E-05    | 0.06 | P.RES-CTRL | mRNA    |
| <i>LOC338797</i>          | -1.5 | 1.37E-05    | 0.06 | P.RES-CTRL | lnc-RNA |
| <i>IGFBP1</i>             | 5.9  | 1.93E-05    | 0.07 | P.RES-CTRL | mRNA    |
| <i>CPEB1</i>              | 2.1  | 1.30E-05    | 0.04 | IUGR-CTRL  | mRNA    |
| <i>TMEM132C</i>           | 2.5  | 1.46E-05    | 0.04 | IUGR-CTRL  | mRNA    |
| <i>TWIST2</i>             | 2.1  | 2.15E-05    | 0.04 | IUGR-CTRL  | mRNA    |
| <i>FGG</i>                | 5.0  | 2.35E-05    | 0.04 | IUGR-CTRL  | mRNA    |
| <i>CYP2A7</i>             | 1.6  | 2.89E-05    | 0.04 | IUGR-CTRL  | mRNA    |
| <i>STAR</i>               | 3.7  | 3.21E-05    | 0.04 | IUGR-CTRL  | mRNA    |
| <i>LOC101929019</i>       | -2.1 | 3.39E-05    | 0.04 | IUGR-CTRL  | lnc-RNA |
| <i>FBXO2</i>              | 2.6  | 3.60E-05    | 0.04 | IUGR-CTRL  | mRNA    |
| <i>IGFBP1</i>             | 5.4  | 3.63E-05    | 0.04 | IUGR-CTRL  | mRNA    |
| <i>CABYR</i>              | 2.2  | 3.66E-05    | 0.04 | IUGR-CTRL  | mRNA    |
| <i>MS4A12</i>             | -2.2 | 4.26E-05    | 0.04 | IUGR-CTRL  | mRNA    |
| <i>TNFRSF8</i>            | 2.3  | 4.34E-05    | 0.04 | IUGR-CTRL  | mRNA    |
| <i>PDZK1IP1</i>           | 3.8  | 4.44E-05    | 0.04 | IUGR-CTRL  | mRNA    |
| <i>CD40LG</i>             | 2.1  | 4.55E-05    | 0.04 | IUGR-CTRL  | mRNA    |
| <i>F2R</i>                | 2.2  | 4.66E-05    | 0.04 | IUGR-CTRL  | mRNA    |
| <i>GNG4</i>               | 2.7  | 4.83E-05    | 0.04 | IUGR-CTRL  | mRNA    |
| <i>RFPL4B</i>             | 2.8  | 5.12E-05    | 0.04 | IUGR-CTRL  | mRNA    |
| <i>ZNF683</i>             | 3.0  | 5.16E-05    | 0.04 | IUGR-CTRL  | mRNA    |
| <i>lnc-TRMT61B-<br/>2</i> | -1.6 | 5.43E-05    | 0.04 | IUGR-CTRL  | lnc-RNA |
| <i>RUNX3</i>              | 1.9  | 5.48E-05    | 0.04 | IUGR-CTRL  | mRNA    |
| <i>SAMD3</i>              | 2.0  | 6.32E-05    | 0.04 | IUGR-CTRL  | mRNA    |
| <i>lnc-F8A2-1</i>         | -2.3 | 6.65E-05    | 0.04 | IUGR-CTRL  | lnc-RNA |

|                      |      |             |      |           |         |
|----------------------|------|-------------|------|-----------|---------|
| <i>CYP3A7</i>        | 1.8  | 7.24E-05    | 0.04 | IUGR-CTRL | mRNA    |
| <i>PRUNE2</i>        | 2.5  | 7.43E-05    | 0.04 | IUGR-CTRL | mRNA    |
| <i>LRRC15</i>        | 3.8  | 7.48E-05    | 0.04 | IUGR-CTRL | mRNA    |
| <i>PRL</i>           | 4.6  | 7.72E-05    | 0.04 | IUGR-CTRL | mRNA    |
| <i>IL1R2</i>         | 4.0  | 7.76E-05    | 0.04 | IUGR-CTRL | mRNA    |
| <i>PCDH11X</i>       | -2.0 | 7.98E-05    | 0.04 | IUGR-CTRL | mRNA    |
| <i>EGFR-AS1</i>      | 3.2  | 8.75E-05    | 0.04 | IUGR-CTRL | lnc-RNA |
| <i>C8orf31</i>       | 1.7  | 8.81E-05    | 0.04 | IUGR-CTRL | mRNA    |
| <i>lnc-SPATA9-1</i>  | -1.9 | 0.000103978 | 0.04 | IUGR-CTRL | lnc-RNA |
| <i>TAC3</i>          | 3.7  | 0.000105524 | 0.04 | IUGR-CTRL | mRNA    |
| <i>DAW1</i>          | 3.3  | 0.000110116 | 0.04 | IUGR-CTRL | mRNA    |
| <i>IGSF10</i>        | 3.1  | 0.000110719 | 0.04 | IUGR-CTRL | mRNA    |
| <i>TM4SF19</i>       | 1.6  | 0.000116817 | 0.04 | IUGR-CTRL | mRNA    |
| <i>RNASE4</i>        | 2.1  | 0.000118813 | 0.04 | IUGR-CTRL | mRNA    |
| <i>ADAD1</i>         | -1.4 | 0.000119749 | 0.04 | IUGR-CTRL | mRNA    |
| <i>lnc-VAPA-1</i>    | 3.3  | 0.000121603 | 0.04 | IUGR-CTRL | lnc-RNA |
| <i>HTR2B</i>         | 2.8  | 0.000126938 | 0.04 | IUGR-CTRL | mRNA    |
| <i>ANKRD22</i>       | 2.2  | 0.000132255 | 0.04 | IUGR-CTRL | mRNA    |
| <i>LINC00473</i>     | 3.7  | 0.000133217 | 0.04 | IUGR-CTRL | lnc-RNA |
| <i>lnc-ESCO2-2</i>   | 1.6  | 0.000136852 | 0.04 | IUGR-CTRL | lnc-RNA |
| <i>MGST1</i>         | 3.7  | 0.000145938 | 0.04 | IUGR-CTRL | mRNA    |
| <i>DKFZp434J0226</i> | 2.3  | 0.000149307 | 0.04 | IUGR-CTRL | lnc-RNA |
| <i>lnc-IL1R2-1</i>   | 3.4  | 0.000151115 | 0.04 | IUGR-CTRL | lnc-RNA |
| <i>lnc-AAAS-1</i>    | 2.1  | 0.000151284 | 0.04 | IUGR-CTRL | lnc-RNA |
| <i>OR2AP1</i>        | -2.0 | 0.000156813 | 0.04 | IUGR-CTRL | mRNA    |
| <i>CHST2</i>         | 1.7  | 0.000160063 | 0.04 | IUGR-CTRL | mRNA    |
| <i>ESRRG</i>         | -1.4 | 0.000161185 | 0.04 | IUGR-CTRL | mRNA    |
| <i>PRG2</i>          | 3.3  | 0.000161779 | 0.04 | IUGR-CTRL | mRNA    |
| <i>lnc-CHADL-2</i>   | -1.5 | 0.000163073 | 0.04 | IUGR-CTRL | lnc-RNA |
| <i>CD8B</i>          | 1.9  | 0.000166495 | 0.04 | IUGR-CTRL | mRNA    |
| <i>EPYC</i>          | 3.7  | 0.000169879 | 0.04 | IUGR-CTRL | mRNA    |
| <i>CATSPER1</i>      | 2.3  | 0.000176967 | 0.04 | IUGR-CTRL | mRNA    |
| <i>KCNK12</i>        | 2.9  | 0.000177811 | 0.04 | IUGR-CTRL | mRNA    |
| <i>lnc-THSD4-2</i>   | -2.2 | 0.000179806 | 0.04 | IUGR-CTRL | lnc-RNA |
| <i>C11orf86</i>      | 2.4  | 0.000182976 | 0.04 | IUGR-CTRL | mRNA    |
| <i>lnc-TCL1B-1</i>   | -2.2 | 0.00018373  | 0.04 | IUGR-CTRL | lnc-RNA |
| <i>SPATA17</i>       | 1.8  | 0.000184485 | 0.04 | IUGR-CTRL | mRNA    |
| <i>lnc-LRTM2-1</i>   | -2.5 | 0.000192404 | 0.04 | IUGR-CTRL | lnc-RNA |
| <i>GNB5</i>          | 1.6  | 0.000193229 | 0.04 | IUGR-CTRL | mRNA    |
| <i>ADCY1</i>         | 2.2  | 0.000202628 | 0.04 | IUGR-CTRL | mRNA    |
| <i>PLA2G7</i>        | 2.3  | 0.000203042 | 0.04 | IUGR-CTRL | mRNA    |
| <i>CLEC10A</i>       | 1.6  | 0.000210211 | 0.04 | IUGR-CTRL | mRNA    |
| <i>HLA-DQA2</i>      | 2.9  | 0.000211841 | 0.04 | IUGR-CTRL | mRNA    |

|                           |      |             |      |           |                     |
|---------------------------|------|-------------|------|-----------|---------------------|
| <i>TRIM64</i>             | 3.6  | 0.000212138 | 0.04 | IUGR-CTRL | mRNA                |
| <i>OR5H14</i>             | 3.0  | 0.000219904 | 0.04 | IUGR-CTRL | mRNA                |
| <i>MAP3K5</i>             | 1.4  | 0.000220729 | 0.04 | IUGR-CTRL | mRNA                |
| <i>CD52</i>               | 1.6  | 0.000232085 | 0.05 | IUGR-CTRL | mRNA                |
| <i>XLOC_12_0091</i><br>39 | 2.9  | 0.000238059 | 0.05 | IUGR-CTRL | lnc-RNA             |
| <i>SLC10A1</i>            | -1.4 | 0.000239942 | 0.05 | IUGR-CTRL | mRNA                |
| <i>CHI3L2</i>             | 2.7  | 0.000248108 | 0.05 | IUGR-CTRL | mRNA                |
| <i>ALDH1A2</i>            | 3.3  | 0.000256783 | 0.05 | IUGR-CTRL | mRNA                |
| <i>CHRD1</i>              | 4.3  | 0.000261357 | 0.05 | IUGR-CTRL | mRNA                |
| <i>IQCA1</i>              | 1.7  | 0.000265497 | 0.05 | IUGR-CTRL | mRNA                |
| <i>FOXL2</i>              | 2.9  | 0.000275905 | 0.05 | IUGR-CTRL | mRNA                |
| <i>PVRIG</i>              | 1.7  | 0.000277524 | 0.05 | IUGR-CTRL | mRNA                |
| <i>GAL</i>                | 1.9  | 0.000278683 | 0.05 | IUGR-CTRL | mRNA                |
| <i>ERP27</i>              | 1.8  | 0.000282581 | 0.05 | IUGR-CTRL | mRNA                |
| <i>lnc-FAM53A-1</i>       | 1.7  | 0.000286837 | 0.05 | IUGR-CTRL | lnc-RNA             |
| <i>CENPV</i>              | 1.9  | 0.000303677 | 0.05 | IUGR-CTRL | mRNA                |
| <i>FCRL3</i>              | 2.0  | 0.000305278 | 0.05 | IUGR-CTRL | mRNA                |
| <i>LOC338797</i>          | -1.2 | 0.000308691 | 0.05 | IUGR-CTRL | lnc-RNA             |
| <i>lnc-TAF4B-4</i>        | -2.0 | 0.000309577 | 0.05 | IUGR-CTRL | lnc-RNA             |
| <i>F12</i>                | 2.2  | 0.000335637 | 0.05 | IUGR-CTRL | mRNA                |
| <i>FOLH1B</i>             | 2.4  | 0.000335927 | 0.05 | IUGR-CTRL | mRNA                |
| <i>RBP4</i>               | 2.8  | 0.000351099 | 0.05 | IUGR-CTRL | mRNA                |
| <i>IL2RB</i>              | 2.7  | 0.000365503 | 0.05 | IUGR-CTRL | mRNA                |
| <i>LOC102723721</i>       | 3.2  | 0.000366813 | 0.05 | IUGR-CTRL | uncharacterize<br>d |
| <i>KLK9</i>               | -1.6 | 0.000367122 | 0.05 | IUGR-CTRL | mRNA                |
| <i>RGL4</i>               | 2.2  | 0.000369389 | 0.05 | IUGR-CTRL | mRNA                |
| <i>SECISBP2L</i>          | -1.3 | 0.000377502 | 0.05 | IUGR-CTRL | mRNA                |
| <i>SCML4</i>              | 2.0  | 0.000378354 | 0.05 | IUGR-CTRL | mRNA                |
| <i>RGS2</i>               | 1.6  | 0.000382116 | 0.05 | IUGR-CTRL | mRNA                |
| <i>PDZK1</i>              | 2.6  | 0.000388702 | 0.05 | IUGR-CTRL | mRNA                |
| <i>HN1</i>                | 1.7  | 0.000390841 | 0.05 | IUGR-CTRL | mRNA                |
| <i>lnc-TNFRSF17</i><br>-2 | -1.4 | 0.000399423 | 0.05 | IUGR-CTRL | lnc-RNA             |
| <i>DEPDC7</i>             | 2.1  | 0.000403639 | 0.05 | IUGR-CTRL | mRNA                |
| <i>TIMP3</i>              | 1.4  | 0.000404213 | 0.05 | IUGR-CTRL | mRNA                |
| <i>LOC100131303</i>       | -1.9 | 0.000404918 | 0.05 | IUGR-CTRL | lnc-RNA             |
| <i>SMPD3</i>              | 1.8  | 0.000408207 | 0.05 | IUGR-CTRL | mRNA                |
| <i>UTS2R</i>              | -2.9 | 0.000408671 | 0.05 | IUGR-CTRL | mRNA                |
| <i>MCEMP1</i>             | 2.3  | 0.000414032 | 0.05 | IUGR-CTRL | mRNA                |
| <i>MAGEB5</i>             | -1.5 | 0.000416586 | 0.05 | IUGR-CTRL | mRNA                |
| <i>lnc-PRKAG2-1</i>       | -1.4 | 0.000424218 | 0.05 | IUGR-CTRL | lnc-RNA             |
| <i>ARSE</i>               | 1.8  | 0.000430985 | 0.05 | IUGR-CTRL | mRNA                |
| <i>LIPK</i>               | 1.3  | 0.000438196 | 0.05 | IUGR-CTRL | mRNA                |

|                              |      |             |      |           |                 |
|------------------------------|------|-------------|------|-----------|-----------------|
| <i>PTPN7</i>                 | 1.8  | 0.000438484 | 0.05 | IUGR-CTRL | mRNA            |
| <i>lnc-INHBA-1</i>           | -1.4 | 0.000446365 | 0.05 | IUGR-CTRL | lnc-RNA         |
| <i>NTN4</i>                  | 1.6  | 0.000447845 | 0.05 | IUGR-CTRL | mRNA            |
| <i>PDE6H</i>                 | 2.8  | 0.000449222 | 0.05 | IUGR-CTRL | mRNA            |
| <i>KLRC1</i>                 | 2.1  | 0.000451959 | 0.05 | IUGR-CTRL | mRNA            |
| <i>ZNF583</i>                | 1.7  | 0.000452832 | 0.05 | IUGR-CTRL | mRNA            |
| <i>PBX4</i>                  | 2.0  | 0.000455867 | 0.05 | IUGR-CTRL | mRNA            |
| <i>MAOB</i>                  | 3.2  | 0.000456858 | 0.05 | IUGR-CTRL | mRNA            |
| <i>ABLIM2</i>                | 1.9  | 0.000457918 | 0.05 | IUGR-CTRL | mRNA            |
| <i>WNT4</i>                  | 2.0  | 0.000467553 | 0.05 | IUGR-CTRL | mRNA            |
| <i>MIR762HG</i>              | 1.5  | 0.00046922  | 0.05 | IUGR-CTRL | lnc-RNA         |
| <i>SMOX</i>                  | 1.7  | 0.000471587 | 0.05 | IUGR-CTRL | mRNA            |
| <i>GZMB</i>                  | 1.9  | 0.000479154 | 0.05 | IUGR-CTRL | mRNA            |
| <i>LINC00967</i>             | -1.6 | 0.000479285 | 0.05 | IUGR-CTRL | lnc-RNA         |
| <i>FNDC3A</i>                | -1.3 | 0.000482089 | 0.05 | IUGR-CTRL | mRNA            |
| <i>LOC102725314</i>          | -1.6 | 0.00048742  | 0.05 | IUGR-CTRL | lnc-RNA         |
| <i>MED4-AS1</i>              | 2.4  | 0.00048965  | 0.05 | IUGR-CTRL | lnc-RNA         |
| <i>PPP4R4</i>                | 2.4  | 0.000491918 | 0.05 | IUGR-CTRL | mRNA            |
| <i>LOC102723906</i>          | -1.3 | 0.000497315 | 0.05 | IUGR-CTRL | uncharacterized |
| <i>ALOXE3</i>                | -1.7 | 0.000503593 | 0.05 | IUGR-CTRL | mRNA            |
| <i>lnc-OSTF1-1</i>           | -1.9 | 0.000505936 | 0.05 | IUGR-CTRL | lnc-RNA         |
| <i>CISD3</i>                 | -3.2 | 0.000518824 | 0.06 | IUGR-CTRL | mRNA            |
| <i>CNR1</i>                  | 3.7  | 0.000521978 | 0.06 | IUGR-CTRL | mRNA            |
| <i>DNASE1L3</i>              | 1.4  | 0.000533908 | 0.06 | IUGR-CTRL | mRNA            |
| <i>XLOC_l2_011737</i>        | -2.3 | 0.000538059 | 0.06 | IUGR-CTRL | lnc-RNA         |
| <i>LOC100129917</i>          | -1.6 | 0.000538602 | 0.06 | IUGR-CTRL | lnc-RNA         |
| <i>LOC100507389</i>          | -1.6 | 0.000548906 | 0.06 | IUGR-CTRL | lnc-RNA         |
| <i>CILP2</i>                 | 2.8  | 0.0005678   | 0.06 | IUGR-CTRL | mRNA            |
| <i>GNLY</i>                  | 3.2  | 0.000567926 | 0.06 | IUGR-CTRL | mRNA            |
| <i>CHI3L1</i>                | 2.1  | 0.00057166  | 0.06 | IUGR-CTRL | mRNA            |
| <i>PCDH20</i>                | 3.9  | 0.000573523 | 0.06 | IUGR-CTRL | mRNA            |
| <i>SKAP1</i>                 | 1.7  | 0.000581543 | 0.06 | IUGR-CTRL | mRNA            |
| <i>C1orf106</i>              | 2.1  | 0.000589736 | 0.06 | IUGR-CTRL | mRNA            |
| <i>SHC3</i>                  | 1.6  | 0.000595615 | 0.06 | IUGR-CTRL | mRNA            |
| <i>TUBA3D</i>                | 1.6  | 0.000608416 | 0.06 | IUGR-CTRL | mRNA            |
| <i>UBD</i>                   | 3.4  | 0.000614629 | 0.06 | IUGR-CTRL | mRNA            |
| <i>METAP1D</i>               | 1.7  | 0.00061935  | 0.06 | IUGR-CTRL | mRNA            |
| <i>lnc-RP11-90J1.9.1.1-3</i> | -2.2 | 0.000624171 | 0.06 | IUGR-CTRL | lnc-RNA         |
| <i>FOXL2NB</i>               | 2.9  | 0.000624836 | 0.06 | IUGR-CTRL | mRNA            |
| <i>SOD2</i>                  | 1.2  | 0.000626595 | 0.06 | IUGR-CTRL | mRNA            |
| <i>CYTIP</i>                 | 1.7  | 0.000630972 | 0.06 | IUGR-CTRL | mRNA            |
| <i>MARCO</i>                 | 1.8  | 0.0006451   | 0.06 | IUGR-CTRL | mRNA            |

|                       |      |             |      |           |         |
|-----------------------|------|-------------|------|-----------|---------|
| <i>CD5</i>            | 2.4  | 0.000653042 | 0.06 | IUGR-CTRL | mRNA    |
| <i>CLDN16</i>         | -1.6 | 0.000653461 | 0.06 | IUGR-CTRL | mRNA    |
| <i>lnc-CYTL1-1</i>    | -1.4 | 0.000662836 | 0.06 | IUGR-CTRL | lnc-RNA |
| <i>LGALS13</i>        | -1.9 | 0.000667784 | 0.06 | IUGR-CTRL | mRNA    |
| <i>P4HA3</i>          | 2.5  | 0.000684343 | 0.06 | IUGR-CTRL | mRNA    |
| <i>KLRB1</i>          | 2.0  | 0.000684973 | 0.06 | IUGR-CTRL | mRNA    |
| <i>LCK</i>            | 1.8  | 0.000692208 | 0.06 | IUGR-CTRL | mRNA    |
| <i>HIST1H1E</i>       | -1.8 | 0.000693374 | 0.06 | IUGR-CTRL | mRNA    |
| <i>ADORA3</i>         | 1.6  | 0.000707803 | 0.06 | IUGR-CTRL | mRNA    |
| <i>KCNIP4-IT1</i>     | -1.2 | 0.000713975 | 0.06 | IUGR-CTRL | lnc-RNA |
| <i>lnc-SLC12A8-1</i>  | 2.1  | 0.000724688 | 0.06 | IUGR-CTRL | lnc-RNA |
| <i>lnc-TMEM88B-1</i>  | -1.7 | 0.000733956 | 0.06 | IUGR-CTRL | lnc-RNA |
| <i>IL17D</i>          | 1.9  | 0.000751408 | 0.06 | IUGR-CTRL | mRNA    |
| <i>ELMOD1</i>         | 1.9  | 0.000751635 | 0.06 | IUGR-CTRL | mRNA    |
| <i>TAP1</i>           | 1.2  | 0.000755757 | 0.06 | IUGR-CTRL | mRNA    |
| <i>ERVV-2</i>         | -2.0 | 0.000766536 | 0.06 | IUGR-CTRL | mRNA    |
| <i>CXCR3</i>          | 1.3  | 0.000788742 | 0.06 | IUGR-CTRL | mRNA    |
| <i>ASCL2</i>          | 2.4  | 0.000791075 | 0.06 | IUGR-CTRL | mRNA    |
| <i>CCL23</i>          | 1.9  | 0.000791543 | 0.06 | IUGR-CTRL | mRNA    |
| <i>LOC101929295</i>   | -1.4 | 0.000804784 | 0.06 | IUGR-CTRL | lnc-RNA |
| <i>lnc-MRPS5-1</i>    | -1.9 | 0.000804913 | 0.06 | IUGR-CTRL | lnc-RNA |
| <i>UCHL1</i>          | 2.8  | 0.000806829 | 0.06 | IUGR-CTRL | mRNA    |
| <i>AFF1</i>           | -1.5 | 0.000815501 | 0.06 | IUGR-CTRL | mRNA    |
| <i>DIRAS2</i>         | 2.9  | 0.000818017 | 0.06 | IUGR-CTRL | mRNA    |
| <i>OLAH</i>           | -2.1 | 0.000818198 | 0.06 | IUGR-CTRL | mRNA    |
| <i>NDP</i>            | 3.2  | 0.000822175 | 0.06 | IUGR-CTRL | mRNA    |
| <i>WBSCR17</i>        | 2.1  | 0.000823818 | 0.06 | IUGR-CTRL | mRNA    |
| <i>TRIM17</i>         | -1.6 | 0.000825157 | 0.06 | IUGR-CTRL | mRNA    |
| <i>lnc-NUP88-1</i>    | -1.3 | 0.000829021 | 0.06 | IUGR-CTRL | lnc-RNA |
| <i>ESX1</i>           | 2.1  | 0.000833669 | 0.06 | IUGR-CTRL | mRNA    |
| <i>PTPN22</i>         | 1.6  | 0.000834372 | 0.06 | IUGR-CTRL | mRNA    |
| <i>GOLGA6L1</i>       | -1.3 | 0.000840164 | 0.06 | IUGR-CTRL | mRNA    |
| <i>CHST15</i>         | 1.3  | 0.000842379 | 0.06 | IUGR-CTRL | mRNA    |
| <i>LOC100506384</i>   | -1.4 | 0.000844989 | 0.06 | IUGR-CTRL | lnc-RNA |
| <i>LGALS14</i>        | -1.8 | 0.000846932 | 0.06 | IUGR-CTRL | mRNA    |
| <i>CXCL10</i>         | 2.6  | 0.000849014 | 0.06 | IUGR-CTRL | mRNA    |
| <i>C1QTNF9</i>        | 2.6  | 0.000853793 | 0.06 | IUGR-CTRL | mRNA    |
| <i>LRRN4CL</i>        | 2.8  | 0.000855967 | 0.06 | IUGR-CTRL | mRNA    |
| <i>CD3D</i>           | 1.7  | 0.00087211  | 0.06 | IUGR-CTRL | mRNA    |
| <i>USP30-AS1</i>      | 1.6  | 0.000876007 | 0.06 | IUGR-CTRL | lnc-RNA |
| <i>XLOC_l2_006624</i> | -1.1 | 0.00087704  | 0.06 | IUGR-CTRL | lnc-RNA |
| <i>LINC01118</i>      | -2.1 | 0.000877208 | 0.06 | IUGR-CTRL | lnc-RNA |
| <i>GPRC5A</i>         | 2.2  | 0.000888466 | 0.06 | IUGR-CTRL | mRNA    |

|                      |      |             |      |           |                 |
|----------------------|------|-------------|------|-----------|-----------------|
| <i>lnc-AMMECR1-1</i> | 1.3  | 0.000889212 | 0.06 | IUGR-CTRL | lnc-RNA         |
| <i>CCL18</i>         | 3.1  | 0.000894963 | 0.06 | IUGR-CTRL | mRNA            |
| <i>MYO16-AS1</i>     | 2.5  | 0.000896026 | 0.06 | IUGR-CTRL | lnc-RNA         |
| <i>KCNJ16</i>        | 2.3  | 0.000917952 | 0.06 | IUGR-CTRL | mRNA            |
| <i>SPACA6P-AS</i>    | -1.5 | 0.000918193 | 0.06 | IUGR-CTRL | lnc-RNA         |
| <i>WT1</i>           | 3.0  | 0.000921661 | 0.06 | IUGR-CTRL | mRNA            |
| <i>LOC100129345</i>  | -2.1 | 0.000925917 | 0.06 | IUGR-CTRL | lnc-RNA         |
| <i>SOAT2</i>         | 1.8  | 0.000953932 | 0.07 | IUGR-CTRL | mRNA            |
| <i>MYBPH</i>         | -1.6 | 0.000965611 | 0.07 | IUGR-CTRL | mRNA            |
| <i>GREB1</i>         | 1.6  | 0.000972739 | 0.07 | IUGR-CTRL | mRNA            |
| <i>CD48</i>          | 2.1  | 0.000980416 | 0.07 | IUGR-CTRL | mRNA            |
| <i>lnc-EPSTI1-1</i>  | 1.8  | 0.000984275 | 0.07 | IUGR-CTRL | lnc-RNA         |
| <i>LINC01449</i>     | -1.3 | 0.000996623 | 0.07 | IUGR-CTRL | lnc-RNA         |
| <i>LSAMP</i>         | 2.0  | 0.00099846  | 0.07 | IUGR-CTRL | mRNA            |
| <i>CST7</i>          | 2.2  | 0.000999542 | 0.07 | IUGR-CTRL | mRNA            |
| <i>SLAMF7</i>        | 2.4  | 0.001005876 | 0.07 | IUGR-CTRL | mRNA            |
| <i>ITGB3</i>         | -1.6 | 0.001023196 | 0.07 | IUGR-CTRL | mRNA            |
| <i>PAWR</i>          | -1.4 | 0.001023248 | 0.07 | IUGR-CTRL | mRNA            |
| <i>SLC1A6</i>        | 2.6  | 0.001035931 | 0.07 | IUGR-CTRL | mRNA            |
| <i>LOC255187</i>     | -1.4 | 0.001041037 | 0.07 | IUGR-CTRL | lnc-RNA         |
| <i>GZMA</i>          | 2.0  | 0.001058674 | 0.07 | IUGR-CTRL | mRNA            |
| <i>SH2D1B</i>        | 2.0  | 0.001075009 | 0.07 | IUGR-CTRL | mRNA            |
| <i>CEND1</i>         | 1.5  | 0.001086491 | 0.07 | IUGR-CTRL | mRNA            |
| <i>FOLH1</i>         | 2.2  | 0.001088624 | 0.07 | IUGR-CTRL | mRNA            |
| <i>ZBED6</i>         | -1.4 | 0.001090231 | 0.07 | IUGR-CTRL | mRNA            |
| <i>EPDR1</i>         | 2.1  | 0.001098599 | 0.07 | IUGR-CTRL | mRNA            |
| <i>S100A4</i>        | 1.1  | 0.001113529 | 0.07 | IUGR-CTRL | mRNA            |
| <i>LOC100132874</i>  | -2.1 | 0.001114455 | 0.07 | IUGR-CTRL | mRNA            |
| <i>LOC101926934</i>  | 2.7  | 0.001114742 | 0.07 | IUGR-CTRL | uncharacterized |
| <i>lnc-PPM1D-1</i>   | -1.3 | 0.001123104 | 0.07 | IUGR-CTRL | lnc-RNA         |
| <i>SIGLEC10</i>      | 1.6  | 0.001129285 | 0.07 | IUGR-CTRL | mRNA            |
| <i>LAYN</i>          | 1.2  | 0.001139114 | 0.07 | IUGR-CTRL | mRNA            |
| <i>lnc-NDUFS5-2</i>  | -1.3 | 0.001144322 | 0.07 | IUGR-CTRL | lnc-RNA         |
| <i>TAGAP</i>         | 1.4  | 0.001147801 | 0.07 | IUGR-CTRL | mRNA            |
| <i>ERV3-1</i>        | -2.1 | 0.0011482   | 0.07 | IUGR-CTRL | mRNA            |
| <i>TTR</i>           | 3.5  | 0.001161967 | 0.07 | IUGR-CTRL | mRNA            |
| <i>STAB2</i>         | 2.8  | 0.001164541 | 0.07 | IUGR-CTRL | mRNA            |
| <i>NKG7</i>          | 1.7  | 0.001175342 | 0.07 | IUGR-CTRL | mRNA            |
| <i>lnc-RABEPK-1</i>  | -1.5 | 0.001177415 | 0.07 | IUGR-CTRL | lnc-RNA         |
| <i>DAPP1</i>         | 1.4  | 0.001199205 | 0.07 | IUGR-CTRL | mRNA            |
| <i>TCL6</i>          | -1.7 | 0.001203249 | 0.07 | IUGR-CTRL | lnc-RNA         |
| <i>HCN2</i>          | -3.0 | 0.001226324 | 0.07 | IUGR-CTRL | mRNA            |
| <i>lnc-CEBPB-4</i>   | -1.3 | 0.001228666 | 0.07 | IUGR-CTRL | lnc-RNA         |

|                           |      |             |      |           |            |
|---------------------------|------|-------------|------|-----------|------------|
| <i>CSDC2</i>              | 1.7  | 0.001229097 | 0.07 | IUGR-CTRL | mRNA       |
| <i>SCARNA1</i>            | -2.0 | 0.001239199 | 0.07 | IUGR-CTRL | other      |
| <i>LOC729739</i>          | 2.5  | 0.001245851 | 0.07 | IUGR-CTRL | mRNA       |
| <i>RBP1</i>               | 1.6  | 0.001249699 | 0.07 | IUGR-CTRL | mRNA       |
| <i>AKNA</i>               | -1.2 | 0.001263587 | 0.07 | IUGR-CTRL | other      |
| <i>CCDC103</i>            | 1.3  | 0.00126561  | 0.07 | IUGR-CTRL | mRNA       |
| <i>TMEM63B</i>            | -2.2 | 0.00126689  | 0.07 | IUGR-CTRL | mRNA       |
| <i>GLT1D1</i>             | 1.7  | 0.001270943 | 0.07 | IUGR-CTRL | mRNA       |
| <i>GAS1</i>               | 2.0  | 0.001279032 | 0.07 | IUGR-CTRL | mRNA       |
| <i>STON1-GTF2<br/>A1L</i> | 1.7  | 0.001279075 | 0.07 | IUGR-CTRL | lnc-RNA    |
| <i>IL15</i>               | 1.8  | 0.001303353 | 0.07 | IUGR-CTRL | mRNA       |
| <i>KIR2DS2</i>            | 2.0  | 0.001324277 | 0.07 | IUGR-CTRL | mRNA       |
| <i>SIT1</i>               | 1.6  | 0.001332386 | 0.07 | IUGR-CTRL | mRNA       |
| <i>LINC00598</i>          | -1.5 | 0.001332667 | 0.07 | IUGR-CTRL | lnc-RNA    |
| <i>CD69</i>               | 2.3  | 0.001340674 | 0.07 | IUGR-CTRL | mRNA       |
| <i>LAG3</i>               | 1.9  | 0.001375772 | 0.08 | IUGR-CTRL | mRNA       |
| <i>PGR</i>                | 1.6  | 0.001389317 | 0.08 | IUGR-CTRL | mRNA       |
| <i>lnc-PHKB-5</i>         | -2.1 | 0.001414276 | 0.08 | IUGR-CTRL | lnc-RNA    |
| <i>TMEM27</i>             | 2.0  | 0.001417013 | 0.08 | IUGR-CTRL | mRNA       |
| <i>GDAP1</i>              | 1.4  | 0.001421656 | 0.08 | IUGR-CTRL | mRNA       |
| <i>SNORA2B</i>            | -1.6 | 0.001426957 | 0.08 | IUGR-CTRL | snRNA      |
| <i>SGK2</i>               | -1.5 | 0.001433966 | 0.08 | IUGR-CTRL | mRNA       |
| <i>CD6</i>                | 1.7  | 0.001436698 | 0.08 | IUGR-CTRL | mRNA       |
| <i>ITGAD</i>              | 1.2  | 0.001437449 | 0.08 | IUGR-CTRL | mRNA       |
| <i>ANK3</i>               | -1.4 | 0.001448583 | 0.08 | IUGR-CTRL | mRNA       |
| <i>LOC100507283</i>       | 1.5  | 0.001455299 | 0.08 | IUGR-CTRL | lnc-RNA    |
| <i>AADAC</i>              | 3.4  | 0.001457791 | 0.08 | IUGR-CTRL | mRNA       |
| <i>UNC5B-AS1</i>          | 1.3  | 0.00145837  | 0.08 | IUGR-CTRL | lnc-RNA    |
| <i>DEFB103A</i>           | -1.5 | 0.001462051 | 0.08 | IUGR-CTRL | mRNA       |
| <i>FAM110C</i>            | 3.0  | 0.00147239  | 0.08 | IUGR-CTRL | mRNA       |
| <i>CRYM</i>               | -1.5 | 0.001475482 | 0.08 | IUGR-CTRL | mRNA       |
| <i>MXRA7</i>              | 1.0  | 0.001477888 | 0.08 | IUGR-CTRL | mRNA       |
| <i>lnc-SOCS5-2</i>        | -1.4 | 0.001489554 | 0.08 | IUGR-CTRL | lnc-RNA    |
| <i>IL1B</i>               | 2.4  | 0.001491734 | 0.08 | IUGR-CTRL | mRNA       |
| <i>KCND2</i>              | 2.4  | 0.001498729 | 0.08 | IUGR-CTRL | mRNA       |
| <i>LCMT1-AS1</i>          | -1.4 | 0.001502805 | 0.08 | IUGR-CTRL | lnc-RNA    |
| <i>RXFP1</i>              | 2.4  | 0.001504898 | 0.08 | IUGR-CTRL | mRNA       |
| <i>lnc-RBM22-1</i>        | -2.3 | 0.001512069 | 0.08 | IUGR-CTRL | lnc-RNA    |
| <i>POTEB3</i>             | -1.8 | 0.001514042 | 0.08 | IUGR-CTRL | mRNA       |
| <i>LOC100129935</i>       | -1.6 | 0.00153108  | 0.08 | IUGR-CTRL | pseudogene |
| <i>MAN1A2</i>             | -1.5 | 0.001550061 | 0.08 | IUGR-CTRL | mRNA       |
| <i>CCK</i>                | -3.2 | 0.001557754 | 0.08 | IUGR-CTRL | mRNA       |
| <i>lnc-LGALS14-<br/>1</i> | -1.4 | 0.001588349 | 0.08 | IUGR-CTRL | lnc-RNA    |



|                           |      |             |      |           |                 |
|---------------------------|------|-------------|------|-----------|-----------------|
| <i>KDELR3</i>             | 1.3  | 0.001613918 | 0.08 | IUGR-CTRL | mRNA            |
| <i>ZNF217</i>             | -1.3 | 0.001617839 | 0.08 | IUGR-CTRL | mRNA            |
| <i>XLOC_l2_0091</i><br>36 | -1.1 | 0.001622694 | 0.08 | IUGR-CTRL | lnc-RNA         |
| <i>ANTXR1</i>             | 1.3  | 0.001623093 | 0.08 | IUGR-CTRL | mRNA            |
| <i>TIFAB</i>              | 2.0  | 0.001627319 | 0.08 | IUGR-CTRL | mRNA            |
| <i>SIGLEC17P</i>          | 1.9  | 0.001642548 | 0.08 | IUGR-CTRL | mRNA            |
| <i>P2RY6</i>              | -1.2 | 0.001644485 | 0.08 | IUGR-CTRL | mRNA            |
| <i>USP43</i>              | -1.5 | 0.001645638 | 0.08 | IUGR-CTRL | mRNA            |
| <i>LOC100289120</i>       | -1.3 | 0.001649035 | 0.08 | IUGR-CTRL | mRNA            |
| <i>HAMP</i>               | 1.3  | 0.001657842 | 0.08 | IUGR-CTRL | mRNA            |
| <i>lnc-FURIN-1</i>        | -1.1 | 0.001681577 | 0.08 | IUGR-CTRL | lnc-RNA         |
| <i>TRAF3IP3</i>           | 1.2  | 0.001685608 | 0.08 | IUGR-CTRL | mRNA            |
| <i>FAM131B</i>            | 1.2  | 0.001710149 | 0.08 | IUGR-CTRL | mRNA            |
| <i>lnc-IKZF2-1</i>        | -1.1 | 0.001713223 | 0.08 | IUGR-CTRL | lnc-RNA         |
| <i>lnc-KLF10-1</i>        | -2.0 | 0.001715422 | 0.08 | IUGR-CTRL | lnc-RNA         |
| <i>lnc-SULF2-3</i>        | -1.4 | 0.001720239 | 0.08 | IUGR-CTRL | lnc-RNA         |
| <i>FHOD3</i>              | 1.9  | 0.001728642 | 0.08 | IUGR-CTRL | mRNA            |
| <i>lnc-SOD2-2</i>         | 1.4  | 0.001735663 | 0.08 | IUGR-CTRL | lnc-RNA         |
| <i>LINC00482</i>          | -1.1 | 0.00173744  | 0.08 | IUGR-CTRL | lnc-RNA         |
| <i>ITK</i>                | 1.8  | 0.001751737 | 0.08 | IUGR-CTRL | mRNA            |
| <i>MB</i>                 | 1.4  | 0.001752163 | 0.08 | IUGR-CTRL | mRNA            |
| <i>LINC01338</i>          | 1.7  | 0.001758866 | 0.08 | IUGR-CTRL | lnc-RNA         |
| <i>lnc-DMXL2-1</i>        | -2.2 | 0.001761488 | 0.08 | IUGR-CTRL | lnc-RNA         |
| <i>PLIN1</i>              | 1.8  | 0.001773563 | 0.08 | IUGR-CTRL | mRNA            |
| <i>FPR3</i>               | 1.5  | 0.001793447 | 0.08 | IUGR-CTRL | mRNA            |
| <i>ALDH1A1</i>            | 1.8  | 0.001823675 | 0.08 | IUGR-CTRL | mRNA            |
| <i>GDPD1</i>              | -1.6 | 0.001823988 | 0.08 | IUGR-CTRL | mRNA            |
| <i>EGLN3</i>              | 2.1  | 0.001825048 | 0.08 | IUGR-CTRL | mRNA            |
| <i>FAM159B</i>            | 2.1  | 0.001829728 | 0.08 | IUGR-CTRL | mRNA            |
| <i>CXCR2P1</i>            | 1.8  | 0.001843508 | 0.08 | IUGR-CTRL | pseudogene      |
| <i>ANKRD30BP3</i>         | -1.4 | 0.001876517 | 0.08 | IUGR-CTRL | mRNA            |
| <i>HSD11B1</i>            | 1.7  | 0.00188097  | 0.08 | IUGR-CTRL | mRNA            |
| <i>SMC5-AS1</i>           | -1.2 | 0.001960651 | 0.09 | IUGR-CTRL | lnc-RNA         |
| <i>GPR45</i>              | -1.9 | 0.001963083 | 0.09 | IUGR-CTRL | mRNA            |
| <i>NEBL-AS1</i>           | -1.3 | 0.001978769 | 0.09 | IUGR-CTRL | lnc-RNA         |
| <i>SPOCK1</i>             | 2.9  | 0.00198205  | 0.09 | IUGR-CTRL | mRNA            |
| <i>PAEP</i>               | 2.8  | 0.001983921 | 0.09 | IUGR-CTRL | mRNA            |
| <i>LOC100293612</i>       | -1.6 | 0.001992719 | 0.09 | IUGR-CTRL | uncharacterized |
| <i>lnc-GLDN-2</i>         | -1.5 | 0.001994009 | 0.09 | IUGR-CTRL | lnc-RNA         |
| <i>GSTM1</i>              | 1.0  | 0.002001027 | 0.09 | IUGR-CTRL | mRNA            |
| <i>SLPI</i>               | 2.5  | 0.002010674 | 0.09 | IUGR-CTRL | mRNA            |
| <i>XLOC_l2_0103</i><br>28 | 1.4  | 0.00201087  | 0.09 | IUGR-CTRL | lnc-RNA         |

|                            |      |             |      |           |            |
|----------------------------|------|-------------|------|-----------|------------|
| <i>lnc-FITM2-1</i>         | -1.4 | 0.002018341 | 0.09 | IUGR-CTRL | lnc-RNA    |
| <i>ANKRD20A5P</i>          | -1.5 | 0.002036634 | 0.09 | IUGR-CTRL | pseudogene |
| <i>PARP9</i>               | 1.1  | 0.002039687 | 0.09 | IUGR-CTRL | mRNA       |
| <i>LOC100507195</i>        | 1.6  | 0.002053712 | 0.09 | IUGR-CTRL | lnc-RNA    |
| <i>RNF224</i>              | 1.3  | 0.002059453 | 0.09 | IUGR-CTRL | mRNA       |
| <i>LOC101929633</i>        | -1.2 | 0.002066796 | 0.09 | IUGR-CTRL | lnc-RNA    |
| <i>lnc-PLCD3-1</i>         | -2.2 | 0.002068612 | 0.09 | IUGR-CTRL | lnc-RNA    |
| <i>lnc-FOLR3-1</i>         | -1.4 | 0.00206957  | 0.09 | IUGR-CTRL | lnc-RNA    |
| <i>DUSP26</i>              | 1.3  | 0.00207924  | 0.09 | IUGR-CTRL | mRNA       |
| <i>FAM105A</i>             | 1.2  | 0.002082458 | 0.09 | IUGR-CTRL | mRNA       |
| <i>SPATA13</i>             | -1.0 | 0.002083583 | 0.09 | IUGR-CTRL | mRNA       |
| <i>CXCL11</i>              | 2.5  | 0.002092788 | 0.09 | IUGR-CTRL | mRNA       |
| <i>MEP1A</i>               | 2.2  | 0.002096283 | 0.09 | IUGR-CTRL | mRNA       |
| <i>TMEM200C</i>            | -2.4 | 0.002128741 | 0.09 | IUGR-CTRL | mRNA       |
| <i>LOC100287042</i>        | -1.2 | 0.002147064 | 0.09 | IUGR-CTRL | lnc-RNA    |
| <i>CCR2</i>                | 2.0  | 0.002147389 | 0.09 | IUGR-CTRL | mRNA       |
| <i>SNORA49</i>             | -1.7 | 0.002155563 | 0.09 | IUGR-CTRL | snRNA      |
| <i>CCDC177</i>             | -1.8 | 0.002166611 | 0.09 | IUGR-CTRL | mRNA       |
| <i>FGF11</i>               | 1.3  | 0.002169067 | 0.09 | IUGR-CTRL | mRNA       |
| <i>NOS3</i>                | -1.3 | 0.002179362 | 0.09 | IUGR-CTRL | mRNA       |
| <i>SLC22A14</i>            | -1.8 | 0.002188382 | 0.09 | IUGR-CTRL | mRNA       |
| <i>PRDM1</i>               | 1.7  | 0.002206612 | 0.09 | IUGR-CTRL | mRNA       |
| <i>lnc-AC074091.13.1-1</i> | -1.9 | 0.002213982 | 0.09 | IUGR-CTRL | lnc-RNA    |
| <i>CD300LF</i>             | 1.7  | 0.002215276 | 0.09 | IUGR-CTRL | mRNA       |
| <i>ZAP70</i>               | 1.6  | 0.002222449 | 0.09 | IUGR-CTRL | mRNA       |
| <i>ENTPD3</i>              | 2.8  | 0.002226258 | 0.09 | IUGR-CTRL | mRNA       |
| <i>LAIR2</i>               | 2.7  | 0.002227507 | 0.09 | IUGR-CTRL | mRNA       |
| <i>SLC43A2</i>             | -1.3 | 0.002228054 | 0.09 | IUGR-CTRL | mRNA       |
| <i>lnc-EIF2AK3-4</i>       | -1.9 | 0.00223469  | 0.09 | IUGR-CTRL | lnc-RNA    |
| <i>TMEM45A</i>             | 1.3  | 0.002244344 | 0.09 | IUGR-CTRL | mRNA       |
| <i>KRTAP11-1</i>           | -1.7 | 0.002248062 | 0.09 | IUGR-CTRL | mRNA       |
| <i>lnc-ARAP2-2</i>         | -1.9 | 0.002295618 | 0.09 | IUGR-CTRL | lnc-RNA    |
| <i>P2RY8</i>               | 1.3  | 0.002300866 | 0.09 | IUGR-CTRL | mRNA       |
| <i>SLC25A30</i>            | 1.2  | 0.002304581 | 0.09 | IUGR-CTRL | mRNA       |
| <i>LOC101929353</i>        | -1.3 | 0.002305833 | 0.09 | IUGR-CTRL | lnc-RNA    |
| <i>LINC00426</i>           | 1.7  | 0.002305894 | 0.09 | IUGR-CTRL | lnc-RNA    |
| <i>lnc-EMP2-2</i>          | -1.8 | 0.0023278   | 0.09 | IUGR-CTRL | lnc-RNA    |
| <i>CAPG</i>                | 1.7  | 0.002334617 | 0.09 | IUGR-CTRL | mRNA       |
| <i>LGALS8-AS1</i>          | -1.6 | 0.002342077 | 0.09 | IUGR-CTRL | lnc-RNA    |
| <i>LINC01119</i>           | -1.4 | 0.002345152 | 0.09 | IUGR-CTRL | lnc-RNA    |
| <i>XLOC_l2_000407</i>      | -1.5 | 0.002375401 | 0.09 | IUGR-CTRL | lnc-RNA    |
| <i>lnc-PSD4-1</i>          | -1.5 | 0.002386767 | 0.09 | IUGR-CTRL | lnc-RNA    |
| <i>LOC101927910</i>        | -1.5 | 0.002395792 | 0.09 | IUGR-CTRL | mRNA       |

|                        |      |             |      |           |                 |
|------------------------|------|-------------|------|-----------|-----------------|
| <i>ASMT</i>            | -1.3 | 0.002399832 | 0.09 | IUGR-CTRL | lnc-RNA         |
| <i>LOC100130238</i>    | -1.5 | 0.002403614 | 0.09 | IUGR-CTRL | lnc-RNA         |
| <i>LOC101929531</i>    | 1.8  | 0.002414208 | 0.09 | IUGR-CTRL | uncharacterized |
| <i>lnc-S1PR2-1</i>     | -1.3 | 0.002425734 | 0.09 | IUGR-CTRL | lnc-RNA         |
| <i>GPR18</i>           | 1.9  | 0.002434741 | 0.09 | IUGR-CTRL | mRNA            |
| <i>C3</i>              | 2.1  | 0.002454063 | 0.09 | IUGR-CTRL | mRNA            |
| <i>OXTR</i>            | 2.4  | 0.002471123 | 0.09 | IUGR-CTRL | mRNA            |
| <i>FAM171B</i>         | -1.8 | 0.002502632 | 0.09 | IUGR-CTRL | mRNA            |
| <i>B2M</i>             | 1.1  | 0.002503243 | 0.09 | IUGR-CTRL | mRNA            |
| <i>lnc-C17orf101-1</i> | -1.4 | 0.002506567 | 0.09 | IUGR-CTRL | lnc-RNA         |
| <i>FLJ31356</i>        | 1.5  | 0.002510017 | 0.09 | IUGR-CTRL | lnc-RNA         |
| <i>LY6K</i>            | 1.4  | 0.00251149  | 0.09 | IUGR-CTRL | mRNA            |
| <i>S100A3</i>          | 1.8  | 0.00251151  | 0.09 | IUGR-CTRL | mRNA            |
| <i>XLOC_l2_003882</i>  | -1.4 | 0.002520177 | 0.09 | IUGR-CTRL | lnc-RNA         |
| <i>IL18RAP</i>         | 1.2  | 0.00252108  | 0.09 | IUGR-CTRL | mRNA            |
| <i>lnc-C11orf30-1</i>  | 1.3  | 0.002531953 | 0.09 | IUGR-CTRL | lnc-RNA         |
| <i>EXTL1</i>           | 1.7  | 0.002533799 | 0.09 | IUGR-CTRL | mRNA            |
| <i>lnc-ARID2-2</i>     | -1.2 | 0.002536546 | 0.09 | IUGR-CTRL | lnc-RNA         |
| <i>MYOZ1</i>           | 1.2  | 0.00253745  | 0.09 | IUGR-CTRL | mRNA            |
| <i>lnc-TMEM132B-4</i>  | -1.8 | 0.002564931 | 0.09 | IUGR-CTRL | lnc-RNA         |
| <i>XLOC_l2_013462</i>  | -1.1 | 0.002566989 | 0.09 | IUGR-CTRL | lnc-RNA         |
| <i>LOC283352</i>       | 1.2  | 0.002574658 | 0.09 | IUGR-CTRL | lnc-RNA         |
| <i>BAGE</i>            | -1.5 | 0.002579074 | 0.09 | IUGR-CTRL | mRNA            |
| <i>TMPRSS4-AS1</i>     | -3.0 | 0.002601474 | 0.09 | IUGR-CTRL | lnc-RNA         |
| <i>CTNND2</i>          | 1.4  | 0.002604725 | 0.09 | IUGR-CTRL | mRNA            |
| <i>PSPHP1</i>          | 3.5  | 0.002613761 | 0.09 | IUGR-CTRL | mRNA            |
| <i>LINC01424</i>       | -1.4 | 0.002622775 | 0.09 | IUGR-CTRL | lnc-RNA         |
| <i>LINC00606</i>       | -1.0 | 0.002629449 | 0.09 | IUGR-CTRL | lnc-RNA         |
| <i>lnc-RAD23B-10</i>   | -1.3 | 0.002635396 | 0.09 | IUGR-CTRL | lnc-RNA         |
| <i>CILP</i>            | 2.1  | 0.002636355 | 0.09 | IUGR-CTRL | mRNA            |
| <i>lnc-ZNF85-1</i>     | -1.7 | 0.00265202  | 0.09 | IUGR-CTRL | lnc-RNA         |
| <i>LOC100132735</i>    | 1.4  | 0.002652574 | 0.09 | IUGR-CTRL | lnc-RNA         |
| <i>IFNG</i>            | 2.2  | 0.002666473 | 0.09 | IUGR-CTRL | mRNA            |
| <i>DLK2</i>            | 1.8  | 0.002680001 | 0.09 | IUGR-CTRL | mRNA            |
| <i>CCL4L2</i>          | 1.7  | 0.002684629 | 0.09 | IUGR-CTRL | mRNA            |
| <i>DPP6</i>            | 1.2  | 0.002684878 | 0.09 | IUGR-CTRL | mRNA            |
| <i>ASMTL-AS1</i>       | -1.0 | 0.002728594 | 0.09 | IUGR-CTRL | lnc-RNA         |
| <i>LOC101929241</i>    | -1.4 | 0.002754342 | 0.09 | IUGR-CTRL | lnc-RNA         |
| <i>C1orf105</i>        | 1.5  | 0.002756583 | 0.09 | IUGR-CTRL | mRNA            |
| <i>IKZF3</i>           | 1.7  | 0.002761962 | 0.09 | IUGR-CTRL | mRNA            |

|                       |      |             |      |           |                 |
|-----------------------|------|-------------|------|-----------|-----------------|
| <i>LINC00924</i>      | 1.3  | 0.002763319 | 0.09 | IUGR-CTRL | lnc-RNA         |
| <i>XLOC_l2_014694</i> | -1.2 | 0.002763983 | 0.09 | IUGR-CTRL | lnc-RNA         |
| <i>PGM2L1</i>         | 1.1  | 0.002782011 | 0.09 | IUGR-CTRL | mRNA            |
| <i>HAGLROS</i>        | 1.6  | 0.00278251  | 0.09 | IUGR-CTRL | lnc-RNA         |
| <i>SNCAIP</i>         | 1.4  | 0.002806348 | 0.09 | IUGR-CTRL | mRNA            |
| <i>ITGAL</i>          | 1.0  | 0.00283814  | 0.09 | IUGR-CTRL | mRNA            |
| <i>ITGB7</i>          | 1.2  | 0.002857445 | 0.10 | IUGR-CTRL | mRNA            |
| <i>CD22</i>           | 1.9  | 0.002859201 | 0.10 | IUGR-CTRL | mRNA            |
| <i>lnc-ZBED1-1</i>    | -1.1 | 0.002864223 | 0.10 | IUGR-CTRL | lnc-RNA         |
| <i>lnc-C1QTNF9-3</i>  | -1.5 | 0.002870511 | 0.10 | IUGR-CTRL | lnc-RNA         |
| <i>HOXD-AS2</i>       | 2.1  | 0.002895047 | 0.10 | IUGR-CTRL | lnc-RNA         |
| <i>SERPINA3</i>       | 2.7  | 0.002920307 | 0.10 | IUGR-CTRL | mRNA            |
| <i>CPB1</i>           | 1.3  | 0.002931426 | 0.10 | IUGR-CTRL | mRNA            |
| <i>KLK10</i>          | -1.2 | 0.002949725 | 0.10 | IUGR-CTRL | mRNA            |
| <i>lnc-MRPS33-1</i>   | -2.1 | 0.002954702 | 0.10 | IUGR-CTRL | lnc-RNA         |
| <i>CHD5</i>           | -1.2 | 0.002955036 | 0.10 | IUGR-CTRL | mRNA            |
| <i>lnc-SPARCL1-1</i>  | -1.2 | 0.002958211 | 0.10 | IUGR-CTRL | lnc-RNA         |
| <i>CTSW</i>           | 1.7  | 0.002962898 | 0.10 | IUGR-CTRL | mRNA            |
| <i>ANKRD6</i>         | 1.3  | 0.002976426 | 0.10 | IUGR-CTRL | mRNA            |
| <i>SH3D21</i>         | -1.2 | 0.002979674 | 0.10 | IUGR-CTRL | mRNA            |
| <i>IL10</i>           | 1.2  | 0.002995702 | 0.10 | IUGR-CTRL | mRNA            |
| <i>ADAMTS6</i>        | -1.8 | 0.002996714 | 0.10 | IUGR-CTRL | mRNA            |
| <i>lnc-TRPM7-1</i>    | -1.4 | 0.003004223 | 0.10 | IUGR-CTRL | lnc-RNA         |
| <i>RXFP3</i>          | -1.4 | 0.003006926 | 0.10 | IUGR-CTRL | mRNA            |
| <i>ZNF354C</i>        | -1.1 | 0.003012467 | 0.10 | IUGR-CTRL | mRNA            |
| <i>ULK4P3</i>         | -1.2 | 0.003035326 | 0.10 | IUGR-CTRL | pseudogene      |
| <i>ULK4</i>           | 2.2  | 0.003053565 | 0.10 | IUGR-CTRL | mRNA            |
| <i>VIP</i>            | 1.2  | 0.003068752 | 0.10 | IUGR-CTRL | mRNA            |
| <i>CLEC19A</i>        | -1.2 | 0.00308394  | 0.10 | IUGR-CTRL | lnc-RNA         |
| <i>LINC00892</i>      | 1.3  | 0.00308566  | 0.10 | IUGR-CTRL | lnc-RNA         |
| <i>LOC100128551</i>   | -1.2 | 0.0030887   | 0.10 | IUGR-CTRL | other           |
| <i>SLC12A8</i>        | 2.6  | 0.003101781 | 0.10 | IUGR-CTRL | mRNA            |
| <i>CD38</i>           | 2.1  | 0.003104344 | 0.10 | IUGR-CTRL | mRNA            |
| <i>AQP9</i>           | 1.5  | 0.003107788 | 0.10 | IUGR-CTRL | mRNA            |
| <i>lnc-PDE4D-1</i>    | -1.6 | 0.003114914 | 0.10 | IUGR-CTRL | lnc-RNA         |
| <i>lnc-ABCD3-1</i>    | 1.8  | 0.00311772  | 0.10 | IUGR-CTRL | lnc-RNA         |
| <i>C12orf42</i>       | 1.8  | 0.003119082 | 0.10 | IUGR-CTRL | mRNA            |
| <i>KISS1</i>          | -2.6 | 0.003149994 | 0.10 | IUGR-CTRL | mRNA            |
| <i>LOC101928015</i>   | 1.1  | 0.003159992 | 0.10 | IUGR-CTRL | uncharacterized |
| <i>SLC45A4</i>        | -1.1 | 0.003162301 | 0.10 | IUGR-CTRL | lnc-RNA         |
| <i>LOC102724593</i>   | 1.3  | 0.003164993 | 0.10 | IUGR-CTRL | lnc-RNA         |

|                        |      |             |      |           |         |
|------------------------|------|-------------|------|-----------|---------|
| <i>LOC729680</i>       | 1.6  | 0.003189533 | 0.10 | IUGR-CTRL | other   |
| <i>ADAMTS2</i>         | 1.1  | 0.003198315 | 0.10 | IUGR-CTRL | mRNA    |
| <i>SST</i>             | 1.7  | 0.003217733 | 0.10 | IUGR-CTRL | mRNA    |
| <i>DEPTOR</i>          | 1.1  | 0.003218237 | 0.10 | IUGR-CTRL | mRNA    |
| <i>RAB27B</i>          | 1.1  | 0.003232296 | 0.10 | IUGR-CTRL | mRNA    |
| <i>FRA10AC1</i>        | 1.0  | 0.003241445 | 0.10 | IUGR-CTRL | mRNA    |
| <i>lnc-C22orf26-4</i>  | -1.5 | 0.003245601 | 0.10 | IUGR-CTRL | lnc-RNA |
| <i>lnc-CACNB3-1</i>    | -1.4 | 0.003248979 | 0.10 | IUGR-CTRL | lnc-RNA |
| <i>TREM2</i>           | 1.3  | 0.003249867 | 0.10 | IUGR-CTRL | mRNA    |
| <i>FXVD3</i>           | -1.1 | 0.003251272 | 0.10 | IUGR-CTRL | mRNA    |
| <i>lnc-FAM27D1.1-3</i> | -1.1 | 0.003281659 | 0.10 | IUGR-CTRL | lnc-RNA |
| <i>LOC100505938</i>    | -1.4 | 0.003284798 | 0.10 | IUGR-CTRL | lnc-RNA |
| <i>SRD5A1</i>          | 1.2  | 0.00331183  | 0.10 | IUGR-CTRL | mRNA    |
| <i>C1QTNF9B</i>        | 1.3  | 0.003333059 | 0.10 | IUGR-CTRL | mRNA    |
| <i>lnc-EIF3M-2</i>     | 1.4  | 0.003340305 | 0.10 | IUGR-CTRL | lnc-RNA |
| <i>lnc-VCX-2</i>       | -1.3 | 0.003352679 | 0.10 | IUGR-CTRL | lnc-RNA |
| <i>VSTM2L</i>          | 1.9  | 0.003377065 | 0.10 | IUGR-CTRL | mRNA    |
| <i>PSPHP1</i>          | 6.1  | 7.01E-06    | 0.10 | P.RES-PS  | mRNA    |
| <i>PSPHP1</i>          | 7.4  | 1.21E-07    | 0.00 | IUGR-PS   | mRNA    |
| <i>PSPH</i>            | 2.3  | 2.26E-06    | 0.02 | IUGR-PS   | mRNA    |

**Supplementary Table S3.** TaqMan Probe Sets Used in the RT-qPCR experiments.

| Gene            | Gene Name                                             | Taqman Assay  |
|-----------------|-------------------------------------------------------|---------------|
| <i>IGFBP1</i>   | Insulin Like Growth Factor Binding Protein 1          | Hs00236877_m1 |
| <i>FGG</i>      | Fibrinogen Gamma Chain                                | Hs00241037_m1 |
| <i>FBXO2</i>    | F-Box Protein 2                                       | Hs00201792_m1 |
| <i>EGFR-AS1</i> | non-coding RNA-                                       | Hs04332527_m1 |
| <i>CPEB1</i>    | Cytoplasmic Polyadenylation Element Binding Protein 1 | Hs00952081_m1 |
| <i>CHST2</i>    | Carbohydrate Sulfotransferase 2                       | Hs00358839_g1 |
| <i>CD40LG</i>   | CD40 Ligand                                           | Hs00163934_m1 |
| <i>CATSPER1</i> | Cation Channel Sperm Associated 1                     | Hs00364950_m1 |
| <i>CABYR</i>    | Calcium Binding Tyrosine Phosphorylation Regulated    | Hs00971710_g1 |
| <i>STAR</i>     | Steroidogenic Acute Regulatory Protein                | Hs00986559_g1 |

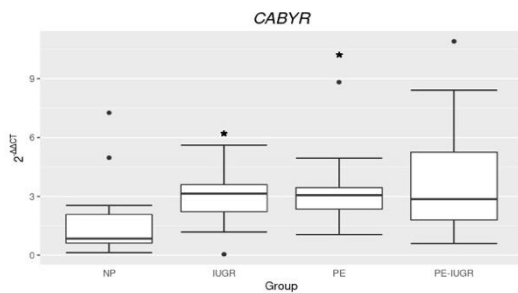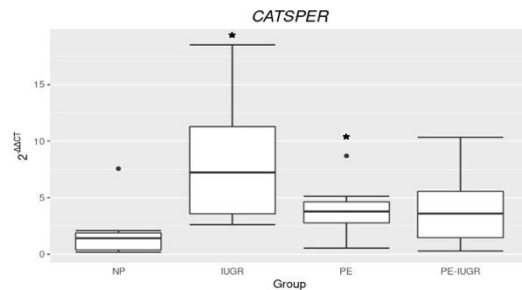

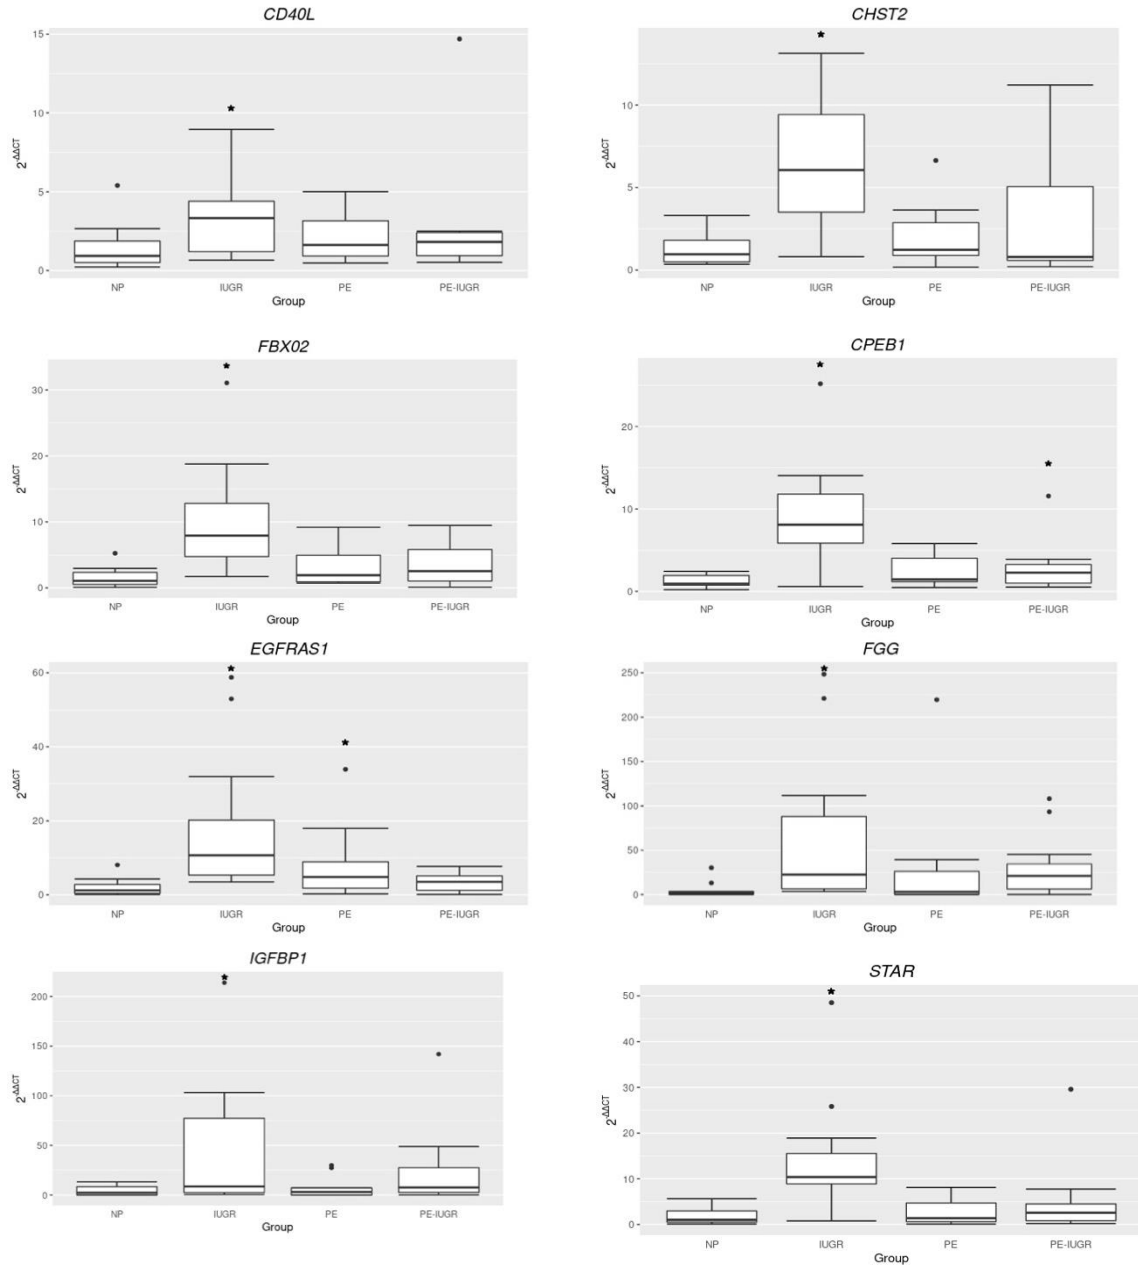

**Supplementary Figure S1.** Expression profiles of the selected differentially expressed genes from the RT-qPCR assays. Boxplots are based on the  $2^{-\Delta\Delta C_t}$  values across all studied groups representing normal pregnancies (NP;  $n = 11$ ), Intrauterine Growth Restriction (IUGR;  $n = 12$ ), PE (Preeclampsia;  $n = 11$ ) and PE-IUGR (Preeclampsia and Intrauterine Growth Restriction;  $n = 11$ ). CATSPER: Cation Channel Sperm Associated 1, CABYR: Calcium Binding Tyrosine Phosphorylation Regulated), CPEB1: Cytoplasmic Polyadenylation Element Binding Protein 1, CD40L: CD40 ligand, CHST2: Carbohydrate Sulfotransferase 2, FBX02: F-Box Protein 2, EGFR-AS1: EGFR Antisense RNA 1, FGG: Fibrinogen Gamma Chain, STAR: Fibrinogen Gamma Chain, IGFBP1: Insulin Like Growth Factor Binding Protein 1.
